# Supplementary material for: A controllable synthesis of nitrogen-doped mesoporous carbon supported MoS2catalysts for hydrodesulfurization of thiophene
Source: Royal Society of Chemistry journal article supplement (doi:10.1039/c6ra22554c), 2016-01-01
Supplement: c6ra22554c1.pdf [file c6ra22554c1.pdf]

## **A Controllable Synthesis of Nitrogen-doped Mesoporous Carbon Supported MoS<sub>2</sub> Catalysts for Hydrodesulfurization of Thiophene**

Jianheng Hu,<sup>a</sup> Zhenwei Zhang,<sup>b</sup> Fei Wang,<sup>\*a</sup> Shifu Zheng,<sup>a</sup> Jinpeng Cai,<sup>a</sup> Jilong Qin,<sup>a</sup>  
Wenwen Liu,<sup>a</sup> Shuai Liang,<sup>a</sup> and Xingmao Jiang<sup>\*a</sup>

<sup>a</sup>Advanced Catalysis and Green Manufacturing Collaborative Innovation Center, School of Petrochemical and Engineering, Changzhou University, Changzhou 213164, PR China.

<sup>b</sup>Department of chemical and Engineering, Changzhou Institute of Technology,  
Changzhou 213022, PR China.

\*Corresponding author: E-mail: [jxm@cczu.edu.cn](mailto:jxm@cczu.edu.cn); [wangfei@cczu.edu.cn](mailto:wangfei@cczu.edu.cn);

Fax: +86-519-8633-0251; Tel: +86-519-8633-0253

Table S1 XPS analysis of the NMC supports

| Urea(g) | Catalyst | N %   | N(PP At. %) |
|---------|----------|-------|-------------|
| 1       | NMC-1    | 6.06  | 7.44        |
| 5       | NMC-5    | 7.17  | 7.32        |
| 10      | NMC-10   | 7.59  | 8.86        |
| 15      | NMC-15   | 8.28  | 9.84        |
| 20      | NMC-20   | 9.42  | 9.51        |
| 25      | NMC-25   | 10.25 | 10.68       |

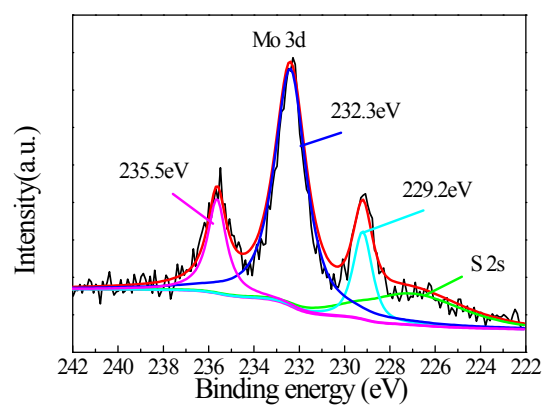

Figure S1 XPS analysis of Mo element in the catalyst 30MoS<sub>2</sub>/NMC-20.
